1 Aldosterone and Dexamethasone Activate African Lungfish Mineralocorticoid Receptor:  
2 Increased Activation After Removal of the Amino-Terminal Domain

3  
4 Yoshinao Katsu<sup>1,2</sup>, Shin Oana<sup>2</sup>, Xiaozhi Lin<sup>2</sup>, Susumu Hyodo<sup>3</sup>, Michael E. Baker<sup>4</sup>

5 <sup>1</sup>Graduate School of Life Science

6 Hokkaido University

7 Sapporo, Japan

8  
9 <sup>2</sup>Faculty of Sciences

10 Hokkaido University

11 Sapporo, Japan

12  
13 <sup>3</sup>Laboratory of Physiology

14 Atmosphere and Ocean Research Institute

15 University of Tokyo

16 Chiba, Japan

17  
18 <sup>4</sup>Division of Nephrology-Hypertension

19 Department of Medicine, 0693

20 University of California, San Diego

21 9500 Gilman Drive

22 La Jolla, CA 92093-0693

23 Center for Academic Research and Training in Anthropogeny (CARTA)

24 University of California, San Diego

25 La Jolla, CA 92093

26  
27 Correspondence to:

28 Y. Katsu: [ykatsu@sci.hokudai.ac.jp](mailto:ykatsu@sci.hokudai.ac.jp)

29 M. E. Baker: [mbaker@ucsd.edu](mailto:mbaker@ucsd.edu)

30

31 **ABSTRACT.** Aldosterone, the main physiological mineralocorticoid in humans and other  
32 terrestrial vertebrates, first appears in lungfish, which are lobe-finned fish that are forerunners of  
33 terrestrial vertebrates. Aldosterone activation of the MR regulates internal homeostasis of water,  
34 sodium and potassium, which was critical in the conquest of land by vertebrates. We studied  
35 transcriptional activation of the slender African lungfish MR by aldosterone, other  
36 corticosteroids and progesterone and find that aldosterone, 11-deoxycorticosterone, 11-  
37 deoxycortisol and progesterone have half-maximal responses (EC50s) below 1 nM and are  
38 potential physiological mineralocorticoids. In contrast, EC50s for corticosterone and cortisol  
39 were 23 nM and 66 nM, respectively. Unexpectedly, truncated lungfish MR, consisting of the  
40 DNA-binding, hinge and steroid-binding domains, had a stronger response to corticosteroids and  
41 progesterone than full-length lungfish MR, indicating that the N-terminal domain represses  
42 steroid activation of lungfish MR, unlike human MR in which the N-terminal domain contains an  
43 activation function. BLAST searches of GenBank did not retrieve a GR ortholog, leading us to  
44 test dexamethasone and triamcinolone for activation of lungfish MR. At 10 nM, both synthetic  
45 glucocorticoids are about 4-fold stronger than 10 nM aldosterone in activating full-length  
46 lungfish MR, leading us to propose that lungfish MR also functions as a GR.

47  
48 **Keywords:** Lungfish, Lobe-finned Fish, Terrestrial Vertebrates, Aldosterone evolution;  
49 mineralocorticoid receptor evolution; evolution

50  
51  
52 **INTRODUCTION**

53 The mineralocorticoid receptor (MR) and glucocorticoid receptor (GR) belong to the  
54 nuclear receptor family, a diverse group of transcription factors that arose in multicellular  
55 animals [1–3]. The MR and GR have key roles in the physiology of humans and other terrestrial  
56 vertebrates and fish [4–11]. The MR and GR evolved from an ancestral corticoid receptor (CR)  
57 in a jawless fish (cyclostome), which has descendants in modern lampreys and hagfish [12–14].  
58 A distinct MR and GR first appear in cartilaginous fishes (Chondrichthyes) [1,13,15–17], which  
59 diverged from bony vertebrates about 450 million years ago [18,19].

60 Aldosterone is the main physiological mineralocorticoid in humans and other terrestrial  
61 vertebrates [5,6,9,20–23]. Aldosterone activation of the MR in the kidney regulates salt and

62 water homeostasis by promoting sodium and water reabsorption and potassium secretion, a  
63 mechanism that conserves salt and water. Thus, it is puzzling that aldosterone is a potent  
64 transcriptional activator of lamprey and hagfish CRs [15], skate MR [16] and elephant shark MR  
65 [13,24] because aldosterone is not synthesized by lampreys [15], cartilaginous fishes or ray  
66 finned fishes [25]. Aldosterone first appears in lungfish [26–28], which are lobe-finned fish that  
67 are forerunners of terrestrial vertebrates [29–31]. The key phylogenetic position of lungfish in  
68 the transition of vertebrates from water to land [27,29,30,32] and the role of the MR in  
69 maintaining internal electrolyte homeostasis [5,8,33,34] motivated us to investigate the response  
70 of the slender African lungfish MR to aldosterone, cortisol and other corticosteroids (Figure 1),  
71 as well as activation by progestins, which also activate elephant shark MR [24], ray-finned fish  
72 MR [35–39] and chicken MR [24,40].  
73

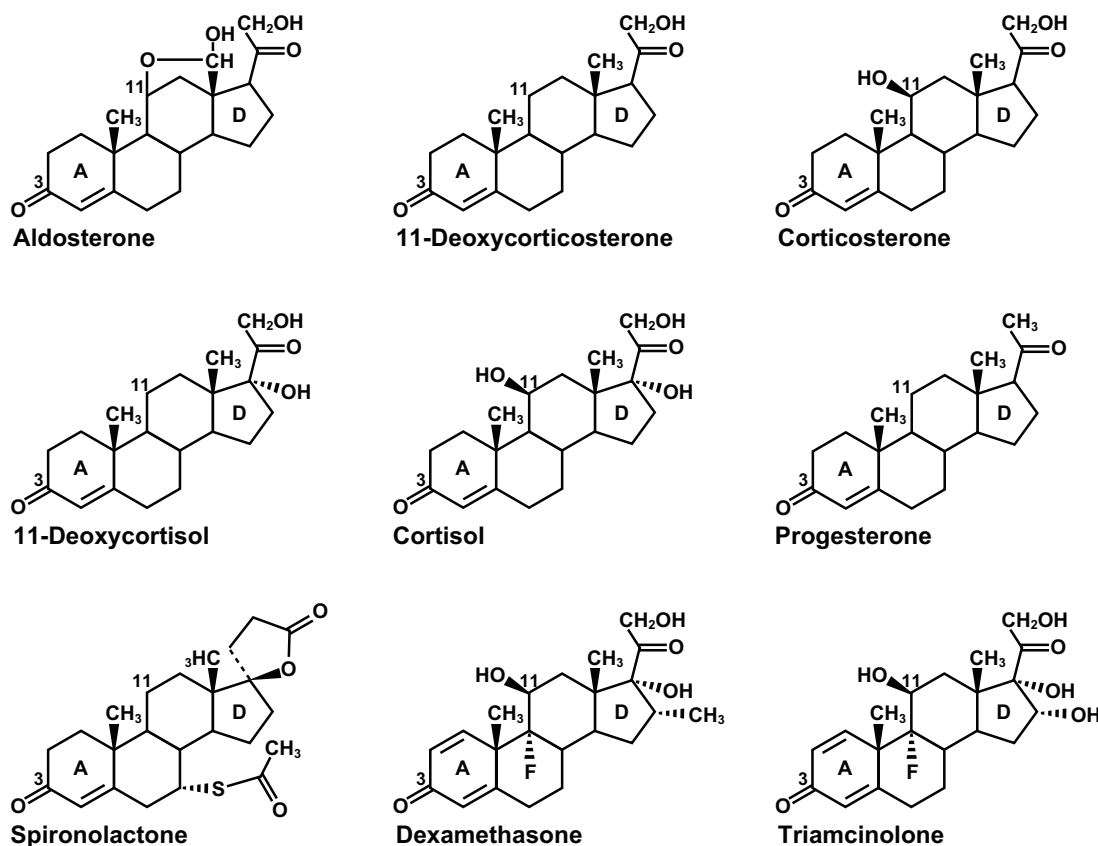

74  
75 **Figure 1. Structures of Corticosteroids, Dexamethasone, Triamcinolone, Progesterone and**  
76 **Spirolactone.** Aldosterone and 11-deoxycorticosterone are mineralocorticoids [41]. 11-  
77 deoxycortisol is a mineralocorticoid in lamprey [42,43]. Cortisol and corticosterone are  
78 glucocorticoids in terrestrial vertebrates and ray-finned fish [41,44]. Dexamethasone and

79 triamcinolone are synthetic glucocorticoids. Progesterone is female reproductive steroid that  
80 also is important in male physiology [45,46]. Spironolactone is a mineralocorticoid antagonist in  
81 humans [47,48].

82

83 Our investigation also uncovered an unexpected role of the N-terminal domain (NTD) of  
84 lungfish MR in inhibiting transcriptional activation by steroids. Like other steroid receptors,  
85 lungfish MR is a multi-domain protein, consisting of an NTD (domains A and B), a central  
86 DNA-binding domain (DBD) (domain C), a hinge domain (D) and a C-terminal ligand-binding  
87 domain (LBD) (domain E) [49–51] (Figure 2). The NTD in the human MR contains an  
88 activation function domain (AF1), which is split into two segments [49–51]. (Figure 2). As  
89 described below, we find that in contrast to human MR [24,49,51,52], the NTD in full-length  
90 lungfish MR reduces steroid-mediated activation of lungfish MR, compared to truncated lungfish  
91 MR-CDE in cells transfected with a 3X-Tyrosine Amino Transferase (TAT3) promoter [53].

92 We also find that lungfish MR is activated by dexamethasone. At 10 nM, dexamethasone  
93 activates full-length lungfish MR and truncated lungfish MR with a signal that is 4-fold and 6-  
94 fold stronger, respectively, than that of 10 nM aldosterone. This strong response to  
95 dexamethasone and the absence of a lungfish GR sequence after a BLAST search of GenBank  
96 leads us to propose that lungfish MR also functions as a GR.

97

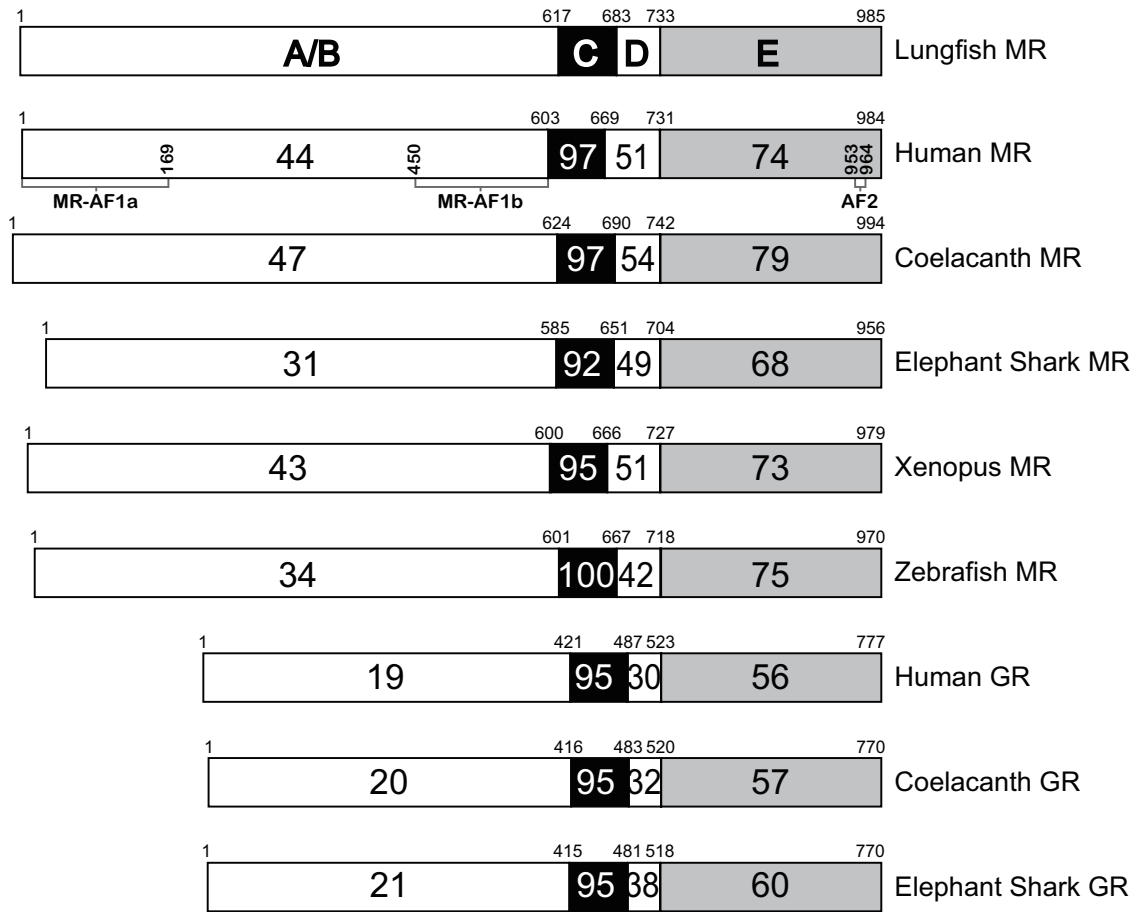

98

99 **Figure 2. Comparison of the functional domains of lungfish MR to corresponding domains**  
100 **in selected vertebrate MRs (human, coelacanth, elephant shark, *Xenopus*, zebrafish) and**  
101 **GRs (human, coelacanth, elephant shark). Lungfish MR and human MR have 97% and 74%**  
102 **identity in DBD and LBD, respectively. Lungfish MR and elephant shark MR have 92% and**  
103 **68% identity in DBD and LBD, respectively. This strong conservation of the DBD and LBD**  
104 **contrasts with the low sequence identity of 44% and 47% between their NTDs. There are**  
105 **similar % identities between corresponding domains in lungfish MR and other MRs.**

106

## 107 RESULTS

108 **Transcriptional activation of full-length and truncated lungfish MR by corticosteroids,**  
109 **progesterins and dexamethasone.**

110 We screened a panel of steroids (Figure 1) at 10 nM for transcriptional activation of full-  
111 length and truncated lungfish MR containing the CDE domains (MR-CDE) using two promoters:  
112 2X-Mouse Mammary Tumor Virus (MMTV) [54,55] and TAT3 [53], which along with plasmids  
113 for both lungfish MRs were transfected into HEK293 cells.

114 As shown in Figure 3A, there was about 2 to 3-fold activation by 10 nM aldosterone,  
115 other corticosteroids or progesterone of full-length lungfish MR using the MMTV-luc reporter  
116 and less steroid activation of lungfish MR-CDE (Figure 3B).

117 Interestingly, compared to activation of full-length lungfish MR with the MMTV  
118 promoter (Figure 3A), transcriptional activation of full-length lungfish MR with a TAT3  
119 promoter and 10 nM aldosterone, other physiological corticosteroids or dexamethasone increased  
120 by about 1.5 to 2-fold (Figure 3C). Unexpectedly, lungfish MR-CDE with the TAT3 promoter  
121 had an additional 2-fold increase in activation by all corticosteroids (Figure 3D). Progesterone  
122 activated lungfish MR in accord with the prediction of Fuller et al. [37,39,56]. Together, these  
123 experiments show that removal of the NTD increases corticosteroid and progesterone activation  
124 of lungfish MR in the presence of the TAT3 promoter.

125 Our results with dexamethasone, which activates human MR [52,57–59], were  
126 unexpected. To our surprise, compared to aldosterone, dexamethasone was about 3-fold and 6-  
127 fold more active, respectively, in activating full-length lungfish MR (Figure 3C) and truncated  
128 lungfish MR (Figure 3D) with the TAT3 promoter. Moreover, both cortisol and corticosterone  
129 have stronger fold-activation than does aldosterone of lungfish MR using the TAT3 promoter.  
130 Under these conditions, lungfish MR appears to have a GR-like response to steroids.

131  
132

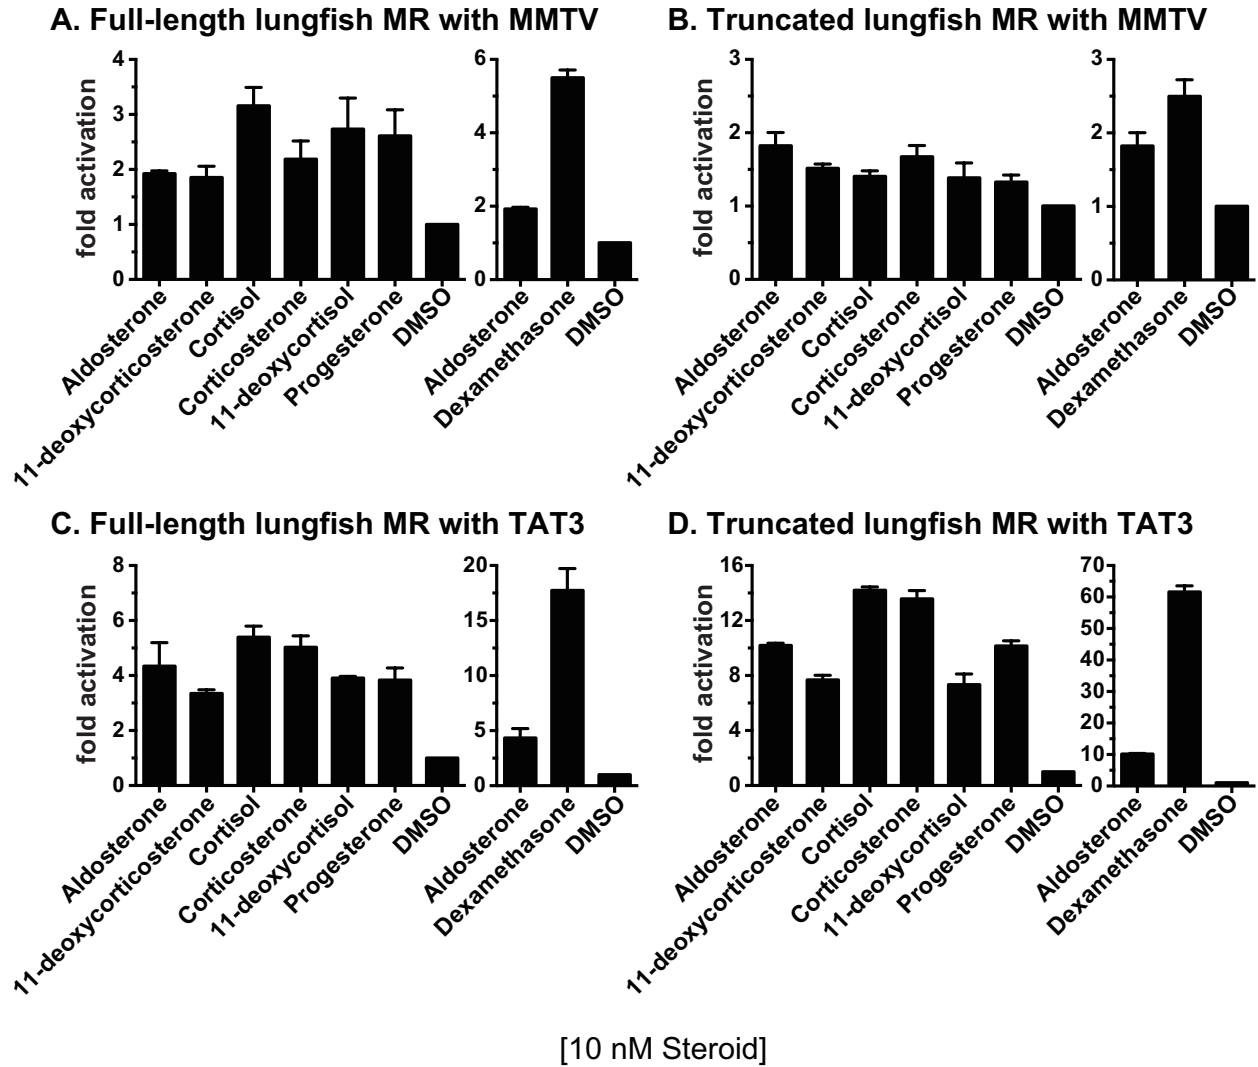

133  
134

135 **Figure 3. Ligand specificity of full-length and truncated lungfish MR.**

136 Plasmids for full-length lungfish MR or truncated lungfish MR (MR-CDE) were expressed in  
137 HEK293 cells with an MMTV-luciferase reporter or a TAT3-luciferase reporter. Transfected  
138 cells were treated with either 10 nM aldosterone, cortisol, 11-deoxycortisol, corticosterone, 11-  
139 deoxycorticosterone, progesterone, dexamethasone or vehicle alone (DMSO). Results are  
140 expressed as means  $\pm$  SEM, n=3. Y-axis indicates fold-activation compared to the activity of  
141 control vector with vehicle alone as 1. A. Full-length lungfish MR with MMTV-luciferase. B.  
142 Truncated lungfish MR (MR-CDE) with MMTV-luciferase. C. Full-length lungfish MR with  
143 TAT3-luciferase. D. Truncated lungfish MR (MR-CDE) with TAT3-luciferase.

144  
145  
146  
147

148 **Spirolactone and eplerenone are transcriptional activators of lungfish MR.**

149 Because spironolactone, an antagonist of human MR, activates elephant shark MR [24],  
150 zebrafish MR [37,40,60] and trout MR [38], we investigated spironolactone for activation of full-  
151 length lungfish MR and truncated lungfish MR-CDE. We also studied activation by eplerenone,  
152 another antagonist of human MR [61]. As shown in Figure 4, both spironolactone and  
153 eplerenone activated lungfish MR with a TAT3 promoter, and there was a further increase in  
154 fold-activation by both steroids of lungfish MR-CDE.

155

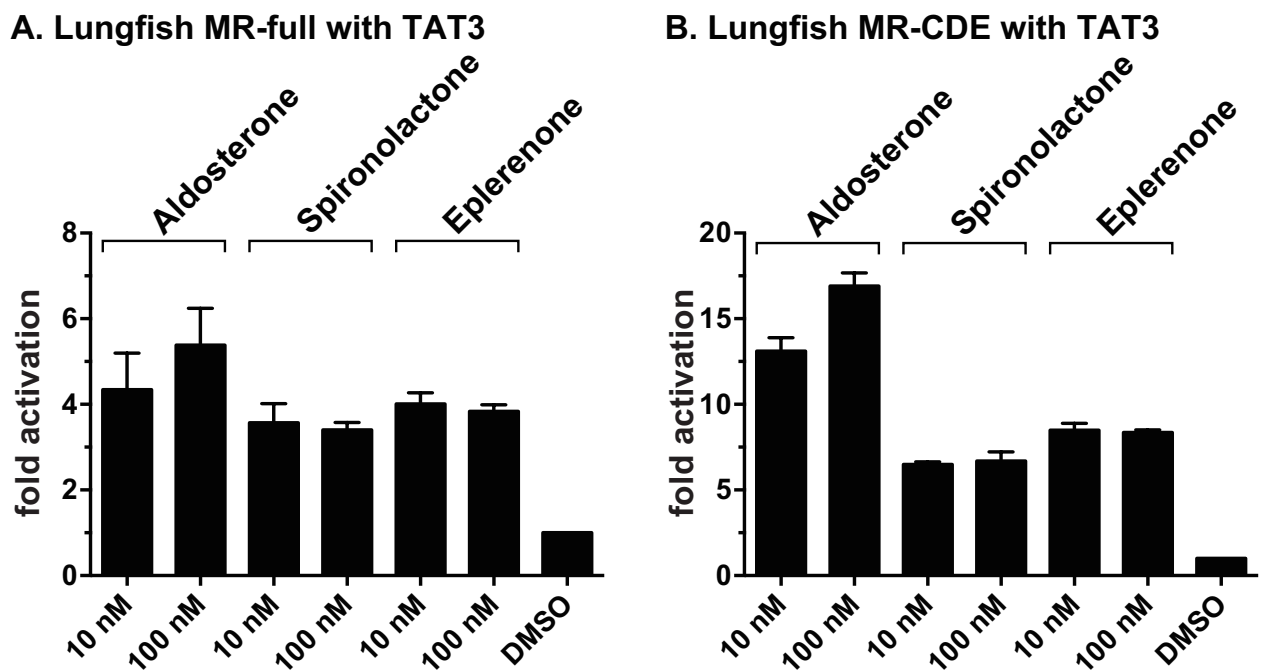

156

157 **Figure 4. Spirolactone and eplerenone activation of full-length and truncated lungfish**  
158 **MR.** Plasmids for full-length lungfish MR or truncated lungfish MR (MR-CDE) were expressed  
159 in HEK293 cells with a TAT3-luciferase reporter. Transfected cells were treated with either 10  
160 nM or 100 nM aldosterone, spironolactone or eplerenone or vehicle alone (DMSO). Results are  
161 expressed as means  $\pm$  SEM, n=3. Y-axis indicates fold-activation compared to the activity of  
162 control vector with vehicle alone as 1. A. Full-length lungfish MR with TAT3. B. Truncated  
163 lungfish MR (MR-CDE) with TAT3.

164



165 **Concentration-dependent activation by corticosteroids and progestins of full-length and**  
166 **truncated lungfish MR.**

167 To gain a quantitative measure of corticosteroid and progestin activation of full-length  
168 and truncated lungfish MR, we determined the concentration dependence of transcriptional  
169 activation by corticosteroids and progestins of full-length lungfish MR and lungfish MR-CDE  
170 using TAT3 (Figure 5). This data was used to calculate a half maximal response (EC50) for  
171 steroid activation of lungfish MR with a TAT3 promoter (Table 1). For full-length lungfish MR,  
172 the four lowest EC50s were for aldosterone (0.04nM), 11-deoxycorticosterone (0.04 nM), 11-  
173 deoxycortisol (0.17nM) and progesterone (0.03nM). These low EC50s are consistent with a  
174 physiological role for one or more of these steroids as ligand for lungfish MR. In contrast,  
175 corticosterone and cortisol, two physiological corticosteroids in terrestrial vertebrates, had EC50s  
176 of 23.1nM and 66.1nM, respectively. Two synthetic glucocorticoids, dexamethasone and  
177 triamcinolone, had EC50s of 4.7nM and 1.3nM, respectively.

178 For truncated lungfish MR, there were similar low EC50s for aldosterone (0.24nM), 11-  
179 deoxycorticosterone (0.013nM), 11-deoxycortisol (0.27nM) and progesterone (0.04nM). EC50s  
180 for corticosterone and cortisol were 85.5nM and 86.7nM, respectively. EC50s for  
181 dexamethasone and triamcinolone were 7.7nM and 2.4nM, respectively.

182 Overall, these results reveal that the EC50s of aldosterone, 11-deoxycorticosterone, 11-  
183 deoxycortisol and progesterone for full-length lungfish MR and lungfish MR-CDE are similar  
184 and that one or more of these steroids could be a physiological mineralocorticoid in lungfish.  
185 Although EC50s for full-length lungfish MR of triamcinolone and dexamethasone were at least  
186 10-fold higher than that of aldosterone, deoxycorticosterone, 11-deoxycortisol and progesterone,  
187 compared to these steroids, dexamethasone and triamcinolone have a several fold higher  
188 activation of full-length and truncated lungfish MR (Figure 5). Consistent with data in Figure 3,  
189 deletion of the NTD to form truncated lungfish MR-CDE increased fold-activation by  
190 aldosterone, the other corticosteroids, progesterone, dexamethasone and triamcinolone.  
191 However, deletion of the NTD did not have a large effect on their EC50s.

192

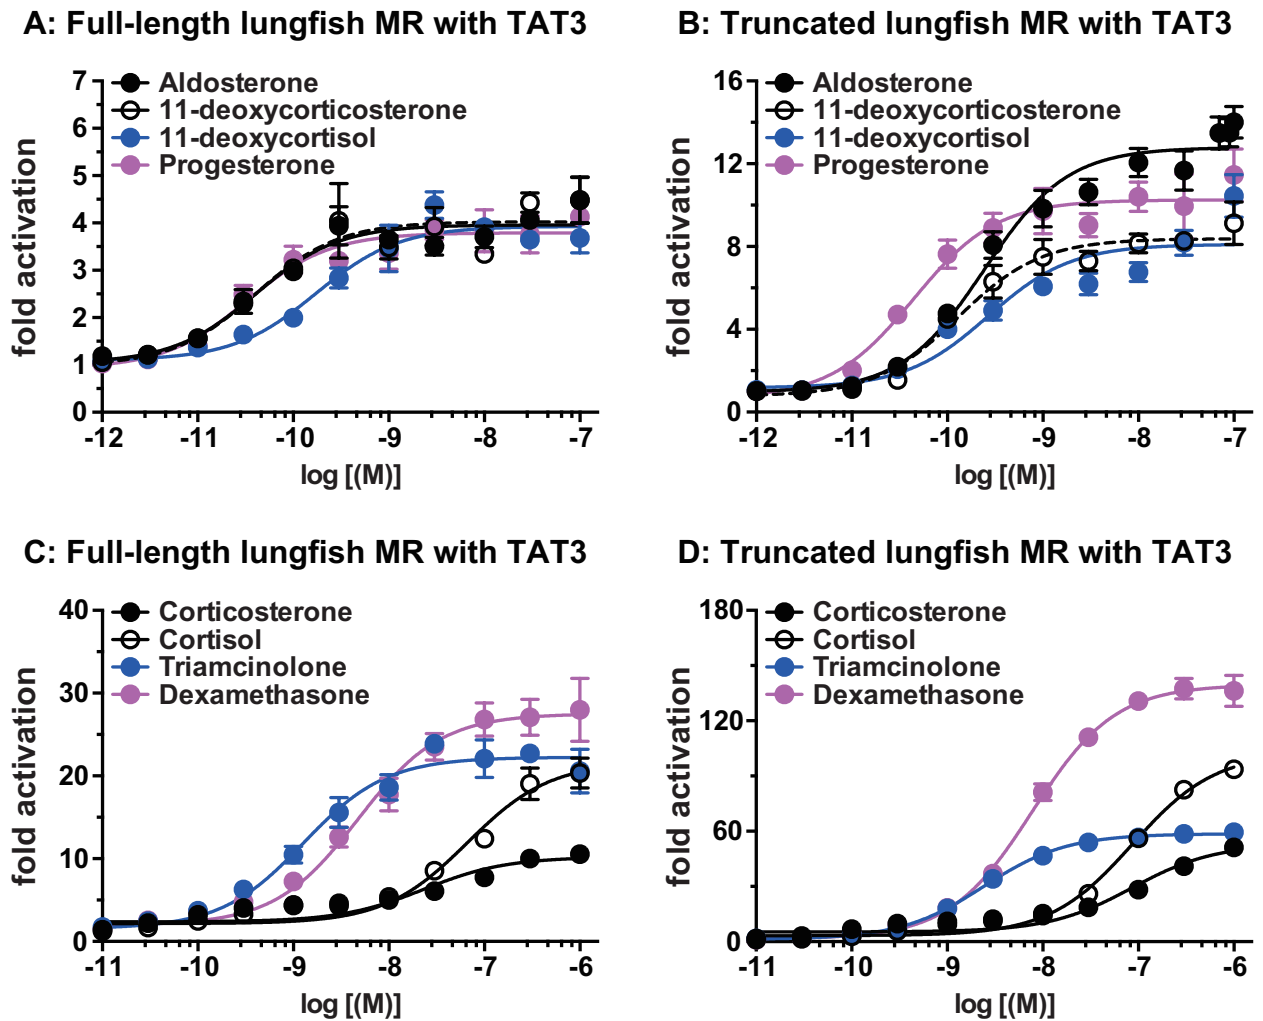

193

194

195 **Fig. 5. Concentration-dependent transcriptional activation by corticosteroids,**  
196 **progesterone, dexamethasone and triamcinolone of full length and truncated lungfish MR.**  
197 Plasmids for full-length lungfish MR or truncated lungfish MR, were expressed in HEK293 cells  
198 with a TAT3-luciferase promoter. Cells were treated with increasing concentrations of either  
199 aldosterone, cortisol, corticosterone, 11-deoxycorticosterone, 11-deoxycortisol, progesterone,  
200 dexamethasone and triamcinolone or vehicle alone (DMSO). Results are expressed as means  $\pm$   
201 SEM, n=3. Y-axis indicates fold-activation compared to the activity of control vector with  
202 vehicle (DMSO) alone as 1. A. Aldosterone, 11-deoxycorticosterone, 11-deoxycortisol and  
203 progesterone with full-length lungfish MR with TAT3-luc. B. Aldosterone, 11-  
204 deoxycorticosterone, 11-deoxycortisol and progesterone with truncated lungfish MR (Domains  
205 CDE) with TAT3-luc. C. Cortisol, corticosterone, dexamethasone and triamcinolone with full-  
206 length lungfish MR with TAT3-luc. D. Cortisol, corticosterone, dexamethasone and  
207 triamcinolone with truncated lungfish MR (Domains CDE) with TAT3-luc.

208

209

210

211

212 **Table 1. EC50 values for steroid activation of full-length and truncated lungfish MR with the TAT3**  
 213 **promoter.**

|                                | <b>Aldosterone</b>  | <b>11-deoxycorticosterone</b> | <b>11-deoxycortisol</b> | <b>Progesterone</b>   |
|--------------------------------|---------------------|-------------------------------|-------------------------|-----------------------|
|                                | <b>EC50</b>         | <b>EC50</b>                   | <b>EC50</b>             | <b>EC50</b>           |
| <b>MR-full length</b>          | <b>0.04 nM</b>      | <b>0.04 nM</b>                | <b>0.17 nM</b>          | <b>0.03 nM</b>        |
| <b>95% confidence interval</b> | <b>0.02-0.07 nM</b> | <b>0.02-0.09 nM</b>           | <b>0.1-0.3 nM</b>       | <b>0.02-0.06 nM</b>   |
| <b>MR-CDE</b>                  | <b>0.24 nM</b>      | <b>0.13 nM</b>                | <b>0.27 nM</b>          | <b>0.044 nM</b>       |
| <b>95% confidence interval</b> | <b>0.17-0.35 nM</b> | <b>0.08-0.2 nM</b>            | <b>0.14-0.53 nM</b>     | <b>0.026-0.076 nM</b> |

214

|                                | <b>Corticosterone</b> | <b>Cortisol</b>      | <b>Triamcinolone</b> | <b>Dexamethasone</b> |
|--------------------------------|-----------------------|----------------------|----------------------|----------------------|
|                                | <b>EC50</b>           | <b>EC50</b>          | <b>EC50</b>          | <b>EC50</b>          |
| <b>MR-full length</b>          | <b>23.1 nM</b>        | <b>66.1 nM</b>       | <b>1.3 nM</b>        | <b>4.7 nM</b>        |
| <b>95% confidence interval</b> | <b>11.3-47.1 nM</b>   | <b>44.5-98.4 nM</b>  | <b>0.9-1.9 nM</b>    | <b>3.3-6.9 nM</b>    |
| <b>MR-CDE</b>                  | <b>85.5 nM</b>        | <b>86.7 nM</b>       | <b>2.4 nM</b>        | <b>7.7 nM</b>        |
| <b>95% confidence interval</b> | <b>60.0-121.8 nM</b>  | <b>74.3-101.2 nM</b> | <b>2.1-2.8 nM</b>    | <b>6.6-9.1 nM</b>    |

215  
 216  
 217 **Transcriptional activation of full-length and truncated human MR and full-length and**  
 218 **truncated elephant shark MR by corticosteroids and progestins.**

219 To gain an evolutionary perspective on activation of lungfish MR by steroids, we  
 220 screened a panel of steroids, at 10 nM, for transcriptional activation of full-length human and  
 221 elephant shark MRs and truncated human and elephant shark MR-CDEs using two reporters:  
 222 MMTV-luc and TAT3-luc.

223 **Comparison of human MR and lungfish MR.**

224 Overall, compared to lungfish MR, fold activation of human MR was significantly higher  
 225 for aldosterone and other corticosteroids. For example, compared to 2-fold activation by  
 226 aldosterone of full-length lungfish MR with the MMTV promoter (Figure 3A), activation of full-  
 227 length human MR by aldosterone was about 70-fold with the MMTV promoter (Figure 6A).  
 228 Although fold-activation by steroids for truncated human MR (Figure 6B) decreased compared  
 229 to full-length human MR (Figure 6A), activation by aldosterone and other corticosteroids of  
 230 truncated human MR with the MMTV promoter (Figure 6B) was about 7-fold higher than for  
 231 truncated lungfish MR (Figure 3B).

232 Unlike for lungfish MR, deletion of the NTD in human MR resulted in a loss of  
233 activation by aldosterone and other corticosteroids for human MR-CDE with both promoters  
234 (Figure 6A-D), consistent with the presence of two activation function domains in the NTD  
235 (Figure 2) [49–52]. The relative loss of activation of human MR was greater with the MMTV  
236 promoter than with the TAT3 promoter. For example, at 10 nM aldosterone, activation of full-  
237 length human MR with the MMTV reporter was 70-fold (Figure 6A), which decreased to 14-fold  
238 for human MR-CDE (Figure 6B). In contrast, at 10 nM aldosterone, fold-activation of human  
239 MR-CDE with the TAT3 promoter was about 75% of activity for full-length human MR (Figure  
240 6C, D). However, 11-deoxycorticosterone and 11-deoxycortisol lost substantial activity for  
241 human MR-CDE with the MMTV and TAT3 promoters (Figure 6D).

242 There also was higher fold-activation by aldosterone of full-length and truncated human  
243 MR with the TAT3 promoter (Figure 6C, D) compared to full-length and truncated lungfish MR  
244 (Figure 3C, D). Aldosterone activation of full-length human MR with the TAT3 promoter  
245 (Figure 6C) was about 45-fold higher than that for full-length lungfish MR with the TAT3  
246 promoter (Figure 3C). Aldosterone activation of human MR-CDE with the TAT3 promoter  
247 (Figure 6D) was about 15-fold higher than that for lungfish MR-CDE (Figure 3D).

248 The relative activation by aldosterone and dexamethasone of human MR and lungfish  
249 MR was reversed. Aldosterone was more active than dexamethasone in stimulating transcription  
250 by full-length human MR and human MR-CDE with the TAT3 promoter (Figure 6C, D). In  
251 contrast, for lungfish MR dexamethasone was more active than aldosterone for full-length  
252 lungfish MR and lungfish MR-CDE with the TAT3 promoter (Figure 3C, D).

253

254

255 **Comparison of elephant shark MR and lungfish MR.**

256           Activation by corticosteroids and progesterone of elephant shark MR with the MMTV  
257 promoter has some similarities with their activation of lungfish MR. Like lungfish MR,  
258 corticosteroids have a similar activation of about 10-fold for full-length and truncated elephant  
259 shark MR, with little difference in potency among the corticosteroids. However, unlike lungfish  
260 MR, aldosterone is stronger than dexamethasone in activating full-length and truncated elephant  
261 shark MR with the MMTV promoter (Figure 6E, F).

262           At a 10 nM steroid concentration, aldosterone and other corticosteroids activated full-  
263 length elephant shark MR with the TAT3 promoter by 9 to 12-fold (Figure 6G), which was  
264 similar to activation with the MMTV promoter (Figure 6E). Activation of full-length elephant  
265 shark MR by progesterone was about 5-fold with the TAT3 and MMTV promoters (Figure 6E,  
266 G). Aldosterone was about 2-fold more active than dexamethasone.

267           However, deletion of the NTD from elephant shark MR resulted in a significant increase  
268 in activation by steroids in the presence of the TAT3 promoter (Figure 6H). Thus, truncated  
269 elephant shark MR with the TAT3 promoter was activated from 300 to 350-fold by aldosterone  
270 and other corticosteroids and about 200-fold by progesterone and dexamethasone (Figure 6H),  
271 indicating that like lungfish MR, the NTD in elephant shark inhibits activation by  
272 corticosteroids. However, unlike lungfish MR, compared to aldosterone, dexamethasone was  
273 less active for full-length and truncated elephant shark MR with the MMTV promoter and  
274 truncated elephant shark MR with the TAT3 promoter.

275  
276

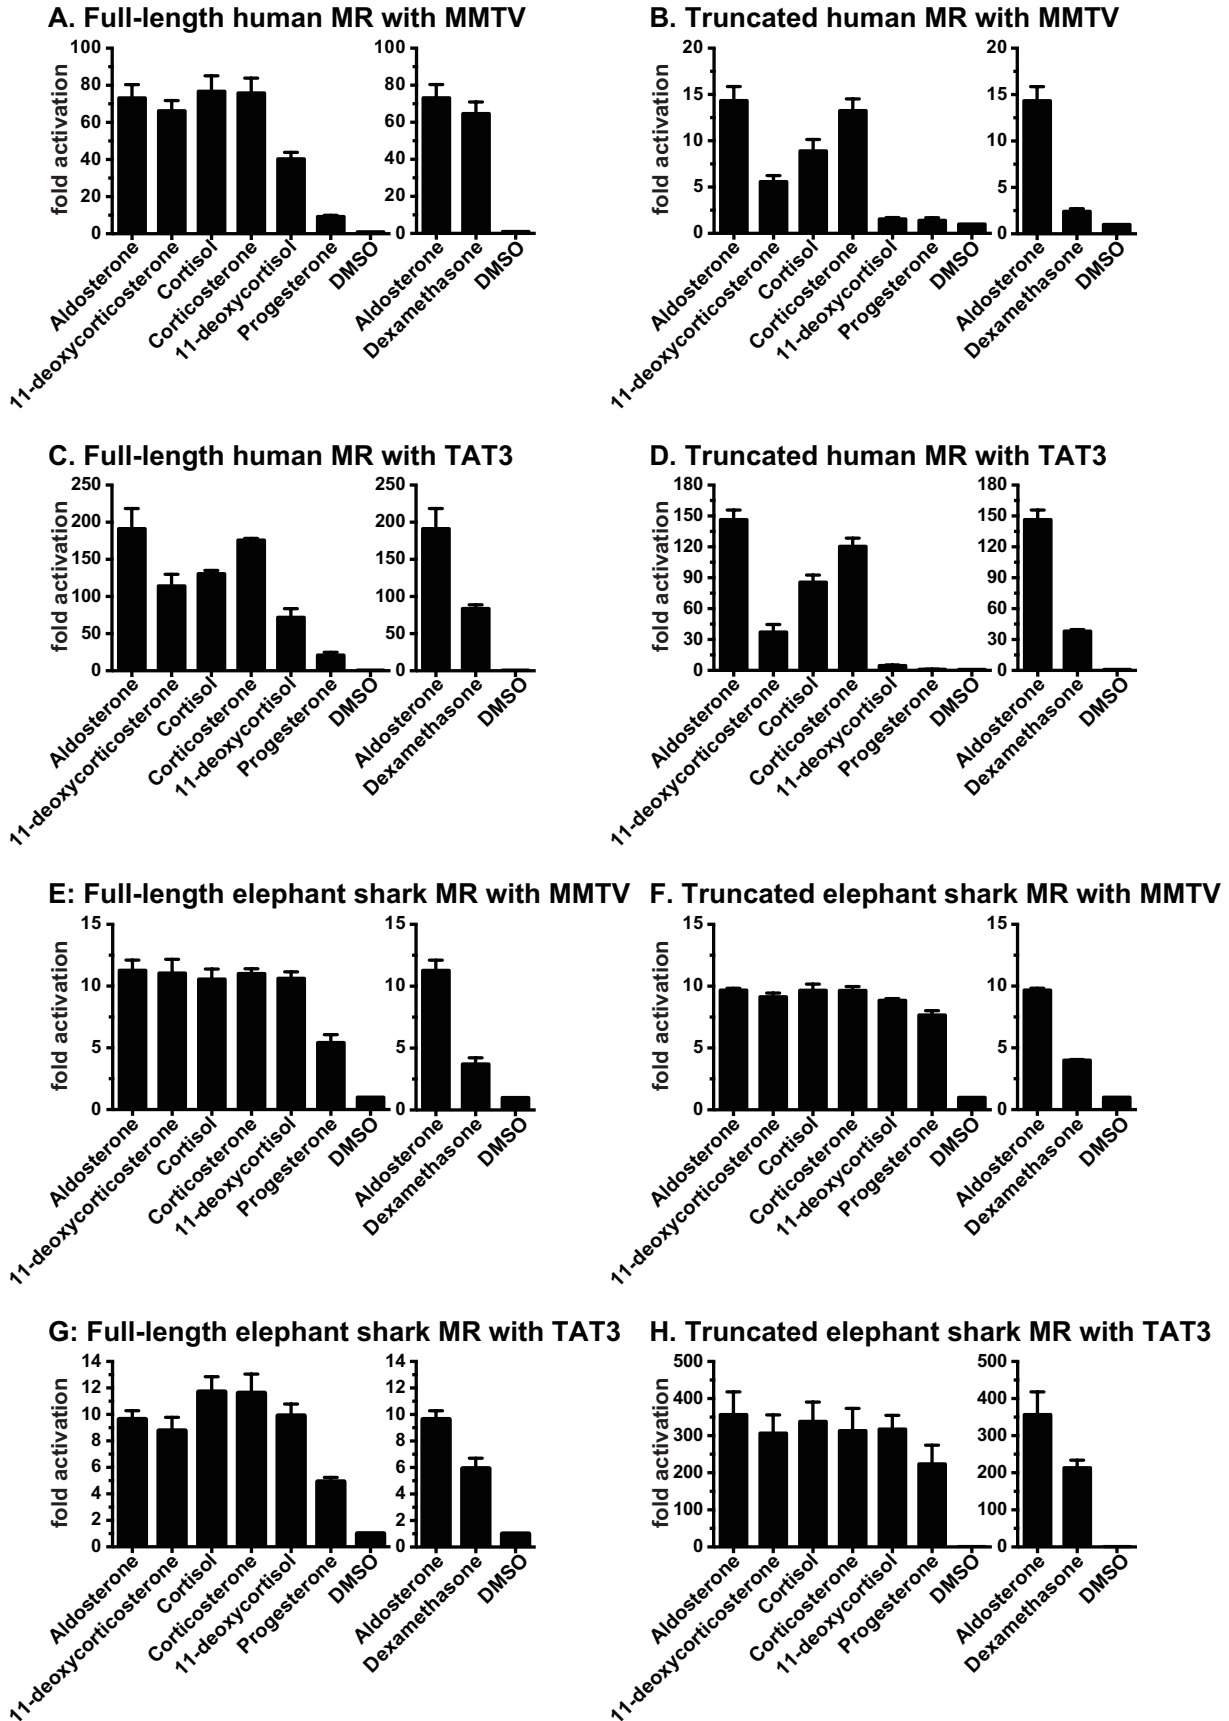

278 **Figure 6. Ligand specificity of full-length and truncated human MR and elephant shark**  
279 **MR.** Plasmids for full-length human and elephant shark MR or truncated human and elephant  
280 shark MR (MR-CDE) were expressed in HEK293 cells with an MMTV-luciferase reporter or a  
281 TAT3-luciferase reporter. Transfected cells were treated with either 10 nM aldosterone, cortisol,  
282 11-deoxycortisol, corticosterone, 11-deoxycorticosterone, progesterone, dexamethasone or  
283 vehicle alone (DMSO). Results are expressed as means  $\pm$  SEM, n=3. Y-axis indicates fold-  
284 activation compared to the activity of control vector with vehicle alone as 1. A. Full-length  
285 human MR with MMTV-luciferase. B. Truncated human MR (MR-CDE) with MMTV-  
286 luciferase. C. Full-length elephant shark MR with TAT3-luciferase. D. Truncated elephant  
287 shark MR (MR-CDE) with TAT3-luciferase.

288

### 289 **Does lungfish contain a separate GR gene?**

290 We used sequences of human GR, coelacanth GR and elephant shark GR as probes in a  
291 BLAST search of GenBank and did not retrieve a lungfish GR sequence. The absence of a  
292 lungfish GR ortholog coupled with the strong response of lungfish MR to dexamethasone and  
293 triamcinolone (Figure 5) leads us to propose that lungfish MR also functions as a GR.

294

### 295 **Discussion**

296 Dobzhansky's aphorism "Nothing in Biology Makes Sense Except in the Light of  
297 Evolution" [62] explains the importance of the evolution of aldosterone in lungfish because  
298 aldosterone activation of the kidney MR in terrestrial vertebrates regulates sodium, potassium  
299 and water transport, which is critical in maintaining internal electrolyte homeostasis in terrestrial  
300 vertebrates [30,34,63–65] an activity that was important in the transition from water to land.  
301 Here we report that aldosterone, 11-deoxycorticosterone, and progesterone have EC50s below 1  
302 nM for lungfish MR (Table 1), which makes these steroids potential physiological ligands for  
303 lungfish MR. Another potential physiological steroid is 11-deoxycortisol, which is a steroid for

304 the CR in Atlantic sea lamprey [42,43]. 11-deoxycortisol has EC<sub>50</sub> of 0.17 nM for full-length  
305 lungfish MR (Table 1).

306 A functional advantage of 11-deoxycorticosterone, 11-deoxycortisol and progesterone as  
307 ligands for the MR is that they lack an 11 $\beta$ -hydroxyl group, and thus, like aldosterone, they are  
308 inert to 11 $\beta$ -hydroxysteroid dehydrogenase-type 2, unlike cortisol and corticosterone [66–69].  
309 Indeed, this inertness to 11 $\beta$ -hydroxysteroid dehydrogenase-type 2 and the low EC<sub>50</sub>s of these  
310 steroids for lungfish MR suggests that more than one corticosteroid and progesterone [39] may  
311 be physiological mineralocorticoids.

312 Like ray-finned fish MRs [24,37,38,60] and elephant shark MR [24,39], lungfish MR is  
313 activated by spironolactone (Figure 4), and, as reported here, by eplerenone [47,48,61].

314 We also find important differences between the response of lungfish MR and human MR  
315 to aldosterone, 11-deoxycorticosterone, 11-deoxycortisol and progesterone, indicating that  
316 further selectivity for aldosterone in human MR occurred during the evolution of terrestrial  
317 vertebrates [13,15,37,40,52,69,70].

318 An unexpected difference between lungfish MR and human MR is the substantial  
319 increase in fold-activation by steroids of lungfish MR after deletion of the NTD, in contrast to  
320 human MR in which the NTD contains an activation function domain (Figure 2) [49–52].  
321 Deletion of the NTD in elephant shark MR also resulted in a substantial increase in fold-  
322 activation by corticosteroids and progesterone using the TAT3 promoter (Figure 6), but not for  
323 the MMTV promoter [17]. These data with lungfish MR and elephant shark MR suggest that  
324 early in the evolution of the MR there was an allosteric interaction between the LBD and NTD  
325 [71,72] that repressed steroid activation of the MR, and that the activation function in the NTD  
326 as found in human MR [49–52] evolved later in terrestrial vertebrates, along with changes in



327 steroid specificity, such loss of MR activation by progesterone [37,39,70]. The different  
328 responses of full-length and truncated lungfish MR, human MR and elephant shark MR with the  
329 MMTV and TAT3 promoters indicate that the NTD and the promoter are important regulators of  
330 steroid activation of these MRs. Corticosteroid activation of these MRs in the presence of other  
331 promoters merits investigation.

332         The stronger response of lungfish MR to dexamethasone compared to aldosterone and the  
333 absence a lungfish GR ortholog sequence are puzzling. At a 10 nM concentration, fold-  
334 activation by dexamethasone and triamcinolone is substantially higher than that of cortisol,  
335 corticosterone, as well as aldosterone, 11-deoxycorticosterone, 11-deoxycortisol and  
336 progesterone for lungfish MR (Figure 5). One explanation is that lungfish MR also has a GR  
337 function.

338

## 339 **Materials and Methods**

### 340 **Chemical reagents**

341         Aldosterone, cortisol, corticosterone, 11-deoxycorticosterone, 11-deoxycortisol and  
342 progesterone, spironolactone and eplerenone were purchased from Sigma-Aldrich. For reporter  
343 gene assays, all hormones were dissolved in dimethyl-sulfoxide (DMSO); the final DMSO  
344 concentration in the culture medium did not exceed 0.1%.

345

### 346 **Animal**

347         A slender spotted African lungfish, *Protopterus dolloi*, was purchased from a local  
348 commercial supplier. Lungfish were anesthetized in freshwater containing 0.02% ethyl 3-  
349 aminobenzoate methane-sulfonate from Sigma-Aldrich, and tissue samples were quickly

350 dissected and frozen in liquid nitrogen. Animal handling procedures conformed to the guidelines  
351 set forth by the Institutional Animal Care and Use Committee at the University of Tokyo.

352

### 353 **Molecular cloning of lungfish mineralocorticoid receptor**

354 Two conserved amino acid regions, GCHYGV and LYFAPD of vertebrate MRs were  
355 selected and degenerate oligonucleotides were used as primers for PCR. First-strand cDNA was  
356 synthesized from 2 µg of total RNA isolated from the liver after amplification, and an additional  
357 primer set (CKVFFK and LYFAPD) was used for the second PCR. The amplified DNA  
358 fragments were subcloned with TA-cloning plasmid pGEM-T Easy vector, sequenced using a  
359 BigDye terminator Cycle Sequencing-kit with T7 and SP6 primers, and analyzed on the 3130  
360 Genetic Analyzer (Applied Biosystems). The 5'- and 3'-ends of the mineralocorticoid receptor  
361 cDNAs were amplified by rapid amplification of the cDNA end (RACE) using a SMART RACE  
362 cDNA Amplification kit. Genbank accessions for this lungfish MR are: Nucleotide ID:  
363 LC630795 and Protein ID: BCV19931.

### 364 **Construction of plasmid vectors**

365 The full-length and truncated MRs were amplified by PCR with KOD DNA polymerase. The  
366 PCR products were gel-purified and ligated into pcDNA3.1 vector (Invitrogen). The truncated  
367 MR proteins were designed to possess methionine and valine residues at the N-terminus and  
368 contain a DNA-binding domain, a hinge-region, and a ligand-binding domain. The truncated  
369 MRs were amplified by PCR with KOD DNA polymerase by using the following primers:  
370 lungfish MR forward primer (5'-  
371 CAAGCTTACCATGGTGTGTCTGGTGTGTGGTGACGAAG-3' containing *Hind*III site) and  
372 lungfish MR reverse primer (5'-CCTACTTCCTGTGAAAGTACAATGAC -3' containing stop

373 codon), human MR forward primer (5'-  
374 CGGATCCACCATGGTGTGTTTGGTGTGTGGGGATGAG-3' containing *Bam*HI site) and  
375 human MR reverse primer (5'-CTCACTTCCGGTGGGAAGTAGAGCGGC -3' containing stop  
376 codon). The amplified DNA fragments were subcloned with TA-cloning plasmid pGEM-T Easy  
377 vector and sequenced, and then subcloned into pcDNA 3.1 vector by using *Hind*III-*Not*I sites for  
378 lungfish MR truncated form or *Bam*HI-*Not*I sites for human MR truncated form. Mouse  
379 mammary tumor virus-long terminal repeat (MMTV-LTR) was amplified from pMSG vector by  
380 PCR, and inserted into pGL3-basic vector containing the *Photinus pyralis* luciferase gene. 3X-  
381 Tyrosine Amino Transferase (TAT3) promoter containing reporter vector named pGL4.23-  
382 TAT3-Luc was constructed as described previously [53]. All cloned DNA sequences were  
383 verified by sequencing.

384

### 385 **Transactivation assay and statistical methods**

386 Transfection and reporter assays were carried out in HEK293 cells, as described previously  
387 [40,73]. All experiments were performed in triplicate. The values shown are mean  $\pm$  SEM from  
388 three separate experiments, and dose-response data, which were used to calculate the half  
389 maximal response (EC50) for each steroid, were analyzed using GraphPad Prism.

### 390 **DECLARATION OF INTEREST**

391 We have no conflict of interest.

392

### 393 **ACKNOWLEDGEMENT**

394 We thank Peter Fuller, Ron de Kloet, Patrick Prunet and Bernard Rossier for constructive  
395 comments about an earlier version of this manuscript.

396

## 397 **AUTHOR CONTRIBUTIONS**

398 Y.K., S.O., and M.E.B. carried out the research and analyzed data. S.H. aided in the collection  
399 of animals. X.L. constructed plasmid DNAs used in this study. Y.K. and M.E.B. conceived and  
400 designed the experiments. Y.K. and M.E.B. wrote the paper. All authors gave final approval for  
401 publication.

402

## 403 **FUNDING**

404 Y.K. was supported in part by Grants-in-Aid for Scientific Research [19K067309] from the  
405 Ministry of Education, Culture, Sports, Science and Technology of Japan, and Takeda Science  
406 Foundation. M.E.B. was supported by Research fund #3096.

407

## 408 **REFERENCES**

- 409 1. Baker ME, Nelson DR, Studer RA. Origin of the response to adrenal and sex steroids:  
410 Roles of promiscuity and co-evolution of enzymes and steroid receptors. *J Steroid Biochem*  
411 *Mol Biol.* 2015;151:12-24. doi:10.1016/j.jsbmb.2014.10.020.
- 412 2. Evans RM. The steroid and thyroid hormone receptor superfamily. *Science.*  
413 1988;240(4854):889-895. doi:10.1126/science.3283939.
- 414 3. Bridgham JT, Eick GN, Larroux C, et al. Protein evolution by molecular tinkering:  
415 diversification of the nuclear receptor superfamily from a ligand-dependent ancestor. *PLoS*  
416 *Biol.* 2010;8(10):e1000497. Published 2010 Oct 5. doi:10.1371/journal.pbio.1000497.
- 417 4. Baker ME, Funder JW, Kattoula SR. Evolution of hormone selectivity in glucocorticoid and  
418 mineralocorticoid receptors [published correction appears in *J Steroid Biochem Mol Biol.*  
419 2014 Jan;139:104]. *J Steroid Biochem Mol Biol.* 2013;137:57-70.  
420 doi:10.1016/j.jsbmb.2013.07.009.
- 421 5. Lifton RP, Gharavi AG, Geller DS. Molecular mechanisms of human hypertension. *Cell.*  
422 2001;104(4):545-556. doi:10.1016/s0092-8674(01)00241-0.

- 423 6. Shibata S. 30 YEARS OF THE MINERALOCORTICOID RECEPTOR: Mineralocorticoid  
424 receptor and NaCl transport mechanisms in the renal distal nephron. *J Endocrinol.*  
425 2017;234(1):T35-T47. doi:10.1530/JOE-16-0669.
- 426 7. Jaisser F, Farman N. Emerging Roles of the Mineralocorticoid Receptor in Pathology:  
427 Toward New Paradigms in Clinical Pharmacology. *Pharmacol Rev.* 2016;68(1):49-75.  
428 doi:10.1124/pr.115.011106.
- 429 8. Hanukoglu I, Hanukoglu A. Epithelial sodium channel (ENaC) family: Phylogeny,  
430 structure-function, tissue distribution, and associated inherited diseases. *Gene.*  
431 2016;579(2):95-132. doi:10.1016/j.gene.2015.12.061.
- 432 9. Joëls M, de Kloet ER. 30 YEARS OF THE MINERALOCORTICOID RECEPTOR: The  
433 brain mineralocorticoid receptor: a saga in three episodes. *J Endocrinol.* 2017  
434 Jul;234(1):T49-T66. doi: 10.1530/JOE-16-0660. PMID: 28634266.
- 435 10. Gross KL, Cidlowski JA. Tissue-specific glucocorticoid action: a family affair. *Trends*  
436 *Endocrinol Metab.* 2008;19(9):331-339. doi:10.1016/j.tem.2008.07.009.
- 437 11. Weikum ER, Knuesel MT, Ortlund EA, Yamamoto KR. Glucocorticoid receptor control of  
438 transcription: precision and plasticity via allostery. *Nat Rev Mol Cell Biol.* 2017;18(3):159-  
439 174. doi:10.1038/nrm.2016.152.
- 440 12. Thornton JW. Evolution of vertebrate steroid receptors from an ancestral estrogen receptor  
441 by ligand exploitation and serial genome expansions. *Proc Natl Acad Sci U S A.* 2001 May  
442 8;98(10):5671-6. doi: 10.1073/pnas.091553298. Epub 2001 May 1. PMID: 11331759;  
443 PMCID: PMC33271.
- 444 13. Baker ME, Katsu Y. 30 YEARS OF THE MINERALOCORTICOID RECEPTOR:  
445 Evolution of the mineralocorticoid receptor: sequence, structure and function. *J Endocrinol.*  
446 2017;234(1):T1-T16. doi:10.1530/JOE-16-0661.
- 447 14. Osório J, Rétaux S. The lamprey in evolutionary studies. *Dev Genes Evol.* 2008  
448 May;218(5):221-35. doi: 10.1007/s00427-008-0208-1. Epub 2008 Feb 15. PMID:  
449 18274775.
- 450 15. Bridgham JT, Carroll SM, Thornton JW. Evolution of hormone-receptor complexity by  
451 molecular exploitation. *Science.* 2006;312(5770):97-101. doi:10.1126/science.1123348.
- 452 16. Carroll SM, Bridgham JT, Thornton JW. Evolution of hormone signaling in elasmobranchs  
453 by exploitation of promiscuous receptors. *Mol Biol Evol.* 2008;25(12):2643-2652.  
454 doi:10.1093/molbev/msn204.
- 455 17. Katsu Y, Shariful IMD, Lin X, Takagi W, Urushitani H, Kohno S, Hyodo S, Baker ME. N-  
456 terminal Domain Regulates Steroid Activation of Elephant Shark Glucocorticoid and  
457 Mineralocorticoid Receptors. *J Steroid Biochem Mol Biol.* 2021 Feb 27:105845. doi:  
458 10.1016/j.jsbmb.2021.105845. Epub ahead of print. PMID: 33652098.

- 459 18. Inoue JG, Miya M, Lam K, et al. Evolutionary origin and phylogeny of the modern  
460 holocephalans (Chondrichthyes: Chimaeriformes): a mitogenomic perspective. *Mol Biol*  
461 *Evol.* 2010;27(11):2576-2586. doi:10.1093/molbev/msq147.
- 462 19. Venkatesh B, Lee AP, Ravi V, et al. Elephant shark genome provides unique insights into  
463 gnathostome evolution [published correction appears in *Nature*. 2014 Sep  
464 25;513(7519):574]. *Nature*. 2014;505(7482):174-179. doi:10.1038/nature12826.
- 465 20. Funder JW. Aldosterone and Mineralocorticoid Receptors-Physiology and  
466 Pathophysiology. *Int J Mol Sci.* 2017 May 11;18(5):1032. doi: 10.3390/ijms18051032.  
467 PMID: 28492512; PMCID: PMC5454944.
- 468 21. Hawkins UA, Gomez-Sanchez EP, Gomez-Sanchez CM, Gomez-Sanchez CE. The  
469 ubiquitous mineralocorticoid receptor: clinical implications. *Curr Hypertens Rep.*  
470 2012;14(6):573-580. doi:10.1007/s11906-012-0297-0.
- 471 22. Rossier BC, Baker ME, Studer RA. Epithelial sodium transport and its control by  
472 aldosterone: the story of our internal environment revisited. *Physiol Rev.* 2015;95(1):297-  
473 340. doi:10.1152/physrev.00011.2014.
- 474 23. Arriza JL, Weinberger C, Cerelli G, et al. Cloning of human mineralocorticoid receptor  
475 complementary DNA: structural and functional kinship with the glucocorticoid receptor.  
476 *Science.* 1987;237(4812):268-275. doi:10.1126/science.3037703.
- 477 24. Katsu Y, Kohno S, Oka K, et al. Transcriptional activation of elephant shark  
478 mineralocorticoid receptor by corticosteroids, progesterone, and spironolactone. *Sci Signal.*  
479 2019;12(584):aar2668. Published 2019 Jun 4. doi:10.1126/scisignal.aar2668, (n.d.).
- 480 25. Jiang JQ, Young G, Kobayashi T, Nagahama Y. Eel (*Anguilla japonica*) testis 11beta-  
481 hydroxylase gene is expressed in interrenal tissue and its product lacks aldosterone  
482 synthesizing activity. *Mol Cell Endocrinol.* 1998;146(1-2):207-211. doi:10.1016/s0303-  
483 7207(98)00147-6.
- 484 26. Joss JM, Itahara Y, Watanabe TX, Nakajima K, Takei Y. Teleost-type angiotensin is  
485 present in Australian lungfish, *Neoceratodus forsteri*. *Gen Comp Endocrinol.*  
486 1999;114(2):206-212. doi:10.1006/gcen.1999.7246.
- 487 27. Joss JM. Lungfish evolution and development. *Gen Comp Endocrinol.* 2006 Sep  
488 15;148(3):285-9. doi: 10.1016/j.ygcen.2005.10.010. Epub 2005 Dec 7. PMID: 16337631.
- 489 28. Uchiyama M, Maejima S, Yoshie S, Kubo Y, Konno N, Joss JM. The epithelial sodium  
490 channel in the Australian lungfish, *Neoceratodus forsteri* (Osteichthyes: Dipnoi). *Proc Biol*  
491 *Sci.* 2012;279(1748):4795-4802. doi:10.1098/rspb.2012.1945.
- 492 29. Meyer A, Schloissnig S, Franchini P, Du K, Woltering JM, Irisarri I, Wong WY,  
493 Nowoshilow S, Kneitz S, Kawaguchi A, Fabrizius A, Xiong P, Dechaud C, Spaink HP,  
494 Volff JN, Simakov O, Burmester T, Tanaka EM, Schartl M. Giant lungfish genome  
495 elucidates the conquest of land by vertebrates. *Nature.* 2021 Feb;590(7845):284-289. doi:

- 496 10.1038/s41586-021-03198-8. Epub 2021 Jan 18. PMID: 33461212; PMCID:  
497 PMC7875771.
- 498 30. Biscotti MA, Gerdol M, Canapa A, Forconi M, Olmo E, Pallavicini A, Barucca M, Scharl  
499 M. The Lungfish Transcriptome: A Glimpse into Molecular Evolution Events at the  
500 Transition from Water to Land. *Sci Rep*. 2016 Feb 24;6:21571. doi: 10.1038/srep21571.  
501 PMID: 26908371; PMCID: PMC4764851.
- 502 31. Brinkmann H, Venkatesh B, Brenner S, Meyer A. Nuclear protein-coding genes support  
503 lungfish and not the coelacanth as the closest living relatives of land vertebrates. *Proc Natl  
504 Acad Sci U S A*. 2004 Apr 6;101(14):4900-5. doi: 10.1073/pnas.0400609101. Epub 2004  
505 Mar 22. PMID: 15037746; PMCID: PMC387346.
- 506 32. Wang K, Wang J, Zhu C, Yang L, Ren Y, Ruan J, Fan G, Hu J, Xu W, Bi X, Zhu Y, Song  
507 Y, Chen H, Ma T, Zhao R, Jiang H, Zhang B, Feng C, Yuan Y, Gan X, Li Y, Zeng H, Liu  
508 Q, Zhang Y, Shao F, Hao S, Zhang H, Xu X, Liu X, Wang D, Zhu M, Zhang G, Zhao W,  
509 Qiu Q, He S, Wang W. African lungfish genome sheds light on the vertebrate water-to-land  
510 transition. *Cell*. 2021 Feb 4:S0092-8674(21)00090-8. doi: 10.1016/j.cell.2021.01.047. Epub  
511 ahead of print. PMID: 33545087.
- 512 33. McCormick SD, Bradshaw D. Hormonal control of salt and water balance in vertebrates.  
513 *Gen Comp Endocrinol*. 2006 May 15;147(1):3-8. doi: 10.1016/j.ygcen.2005.12.009. Epub  
514 2006 Feb 2. PMID: 16457828.
- 515 34. Rossier BC. Osmoregulation during Long-Term Fasting in Lungfish and Elephant Seal: Old  
516 and New Lessons for the Nephrologist. *Nephron*. 2016;134(1):5-9. doi:  
517 10.1159/000444307. Epub 2016 Feb 23. PMID: 26901864.
- 518 35. Sugimoto A, Oka K, Sato R, Adachi S, Baker ME, Katsu Y. Corticosteroid and  
519 progesterone transactivation of mineralocorticoid receptors from Amur sturgeon and  
520 tropical gar. *Biochem J*. 2016;473(20):3655-3665. doi:10.1042/BCJ20160579.
- 521 36. Katsu Y, Baker ME. Progesterone activation of zebrafish mineralocorticoid receptor may  
522 influence growth of some transplanted tumors. *Proc Natl Acad Sci U S A*.  
523 2018;115(13):E2908-E2909. doi:10.1073/pnas.1802441115.
- 524 37. Fuller PJ, Yao YZ, Jin R, et al. Molecular evolution of the switch for progesterone and  
525 spironolactone from mineralocorticoid receptor agonist to antagonist. *Proc Natl Acad Sci U  
526 S A*. 2019;116(37):18578-18583. doi:10.1073/pnas.1903172116, (n.d.).
- 527 38. Sturm A, Bury N, Dengreville L, et al. 11-deoxycorticosterone is a potent agonist of the  
528 rainbow trout (*Oncorhynchus mykiss*) mineralocorticoid receptor. *Endocrinology*.  
529 2005;146(1):47-55. doi:10.1210/en.2004-0128.
- 530 39. Baker ME, Katsu Y. Progesterone: An enigmatic ligand for the mineralocorticoid receptor.  
531 *Biochem Pharmacol*. 2020;177:113976. doi:10.1016/j.bcp.2020.113976.

- 532 40. Katsu Y, Oka K, Baker ME. Evolution of human, chicken, alligator, frog, and zebrafish  
533 mineralocorticoid receptors: Allosteric influence on steroid specificity. *Sci Signal*.  
534 2018;11(537):eaa01520. Published 2018 Jul 3. doi:10.1126/scisignal.aao1.
- 535 41. Baker ME, Funder JW, Kattoula SR. Evolution of hormone selectivity in glucocorticoid and  
536 mineralocorticoid receptors [published correction appears in *J Steroid Biochem Mol Biol*.  
537 2014 Jan;139:104]. *J Steroid Biochem Mol Biol*. 2013;137:57-70.  
538 doi:10.1016/j.jsbmb.2013.07.009.
- 539 42. Close DA, Yun SS, McCormick SD, Wildbill AJ, Li W. 11-deoxycortisol is a corticosteroid  
540 hormone in the lamprey. *Proc Natl Acad Sci U S A*. 2010 Aug 3;107(31):13942-7. doi:  
541 10.1073/pnas.0914026107. Epub 2010 Jul 19. PMID: 20643930; PMCID: PMC2922276.
- 542 43. Shaughnessy CA, Barany A, McCormick SD. 11-Deoxycortisol controls hydromineral  
543 balance in the most basal osmoregulating vertebrate, sea lamprey (*Petromyzon marinus*).  
544 *Sci Rep*. 2020;10(1):12148. Published 2020 Jul 22. doi:10.1038/s41598-020-69061-4.
- 545 44. Bridgham JT, Carroll SM, Thornton JW. Evolution of hormone-receptor complexity by  
546 molecular exploitation. *Science*. 2006;312(5770):97-101. doi:10.1126/science.1123348.
- 547 45. Conneely OM, Mulac-Jericevic B, DeMayo F, Lydon JP, O'Malley BW. Reproductive  
548 functions of progesterone receptors. *Recent Prog Horm Res*. 2002;57:339-355.  
549 doi:10.1210/rp.57.1.339.
- 550 46. Publicover S, Barratt C. Reproductive biology: Progesterone's gateway into sperm  
551 [published correction appears in *Nature*. 2011 Mar 31;471(7340):589]. *Nature*.  
552 2011;471(7338):313-314. doi:10.1038/471313a.
- 553 47. Epstein M, Calhoun DA. Aldosterone blockers (mineralocorticoid receptor antagonism) and  
554 potassium-sparing diuretics. *J Clin Hypertens (Greenwich)*. 2011 Sep;13(9):644-8. doi:  
555 10.1111/j.1751-7176.2011.00511.x. Epub 2011 Aug 9. PMID: 21896143.
- 556 48. Kolkhof P, Bärfacker L. 30 YEARS OF THE MINERALOCORTICOID RECEPTOR:  
557 Mineralocorticoid receptor antagonists: 60 years of research and development. *J*  
558 *Endocrinol*. 2017 Jul;234(1):T125-T140. doi: 10.1530/JOE-16-0600. PMID: 28634268;  
559 PMCID: PMC5488394.
- 560 49. Fuse H, Kitagawa H, Kato S. Characterization of transactivational property and coactivator  
561 mediation of rat mineralocorticoid receptor activation function-1 (AF-1). *Mol Endocrinol*.  
562 2000 Jun;14(6):889-99. doi: 10.1210/mend.14.6.0467. PMID: 10847590.
- 563 50. Fischer K, Kelly SM, Watt K, Price NC, McEwan IJ. Conformation of the  
564 Mineralocorticoid Receptor N-Terminal Domain: Evidence for Induced and Stable  
565 Structure. *Mol Endocrinol*. 2010 Oct;24(10):1935-48. Doi: 10.1210/Me.2010-0005. Epub  
566 2010 Aug 4. PMID: 20685853; PMCID: PMC5417395.”.



- 567 51. Pascual-Le Tallec L, Lombès M. The mineralocorticoid receptor: a journey exploring its  
568 diversity and specificity of action. *Mol Endocrinol*. 2005 Sep;19(9):2211-21. doi:  
569 10.1210/me.2005-0089. Epub 2005 Mar 31. PMID: 15802372.
- 570 52. Rupprecht R, Arriza JL, Spengler D, et al. Transactivation and synergistic properties of the  
571 mineralocorticoid receptor: relationship to the glucocorticoid receptor. *Mol Endocrinol*.  
572 1993;7(4):597-603. doi:10.1210/mend.7.4.8388999.
- 573 53. Iñiguez-Lluhí JA, Pearce D. A common motif within the negative regulatory regions of  
574 multiple factors inhibits their transcriptional synergy. *Mol Cell Biol*. 2000  
575 Aug;20(16):6040-50. doi: 10.1128/mcb.20.16.6040-6050.2000. PMID: 10913186; PMCID:  
576 PMC86080.
- 577 54. Beato M, Arnemann J, Chalepakis G, Slater E, Willmann T. Gene regulation by steroid  
578 hormones. *J Steroid Biochem*. 1987;27(1-3):9-14. doi: 10.1016/0022-4731(87)90288-3.  
579 PMID: 2826895.
- 580 55. Cato AC, Skroch P, Weinmann J, Butkeraitis P, Ponta H. DNA sequences outside the  
581 receptor-binding sites differently modulate the responsiveness of the mouse mammary  
582 tumour virus promoter to various steroid hormones. *EMBO J*. 1988 May;7(5):1403-10.  
583 PMID: 2842149; PMCID: PMC458390.
- 584 56. Fuller PJ, Yao Y, Yang J, Young MJ. Mechanisms of ligand specificity of the  
585 mineralocorticoid receptor. *J Endocrinol*. 2012 Apr;213(1):15-24. doi: 10.1530/JOE-11-  
586 0372. Epub 2011 Dec 12. PMID: 22159507.
- 587 57. Lombes M, Kenouch S, Souque A, Farman N, Rafestin-Oblin ME. The Mineralocorticoid  
588 Receptor Discriminates Aldosterone from Glucocorticoids Independently of the 11 Beta-  
589 Hydroxysteroid Dehydrogenase. *Endocrinology*. 1994;135(3):834-840.  
590 Doi:10.1210/Endo.135.3.8070376.
- 591 58. Hellal-Levy C, Couette B, Fagart J, Souque A, Gomez-Sanchez C, Rafestin-Oblin M.  
592 Specific hydroxylations determine selective corticosteroid recognition by human  
593 glucocorticoid and mineralocorticoid receptors. *FEBS Lett*. 1999;464(1-2):9-13.  
594 doi:10.1016/s0014-5793(99)01667-1.
- 595 59. Mani O, Nashev LG, Livelio C, Baker ME, Odermatt A. Role of Pro-637 and Gln-642 in  
596 human glucocorticoid receptors and Ser-843 and Leu-848 in mineralocorticoid receptors in  
597 their differential responses to cortisol and aldosterone. *J Steroid Biochem Mol Biol*. 2016  
598 May;159:31-40. doi: 10.1016/j.jsbmb.2016.02.017. Epub 2016 Feb 22. PMID: 26907965.
- 599 60. Pippal JB, Cheung CM, Yao YZ, Brennan FE, Fuller PJ. Characterization of the zebrafish  
600 (*Danio rerio*) mineralocorticoid receptor. *Mol Cell Endocrinol*. 2011 Jan 30;332(1-2):58-66.  
601 doi: 10.1016/j.mce.2010.09.014. Epub 2010 Oct 12. PMID: 20932876.
- 602 61. Kiilerich P, Triqueneaux G, Christensen NM, et al. Interaction between the trout  
603 mineralocorticoid and glucocorticoid receptors in vitro. *J Mol Endocrinol*. 2015;55(1):55-  
604 68. doi:10.1530/JME-15-0002.

- 605 62. Dobzhansky.T (1973) Nothing in Biology Makes Sense except in the Light of Evolution.  
606 Am Biol Teach 35(3):125-129.
- 607 63. Fournier D, Luft FC, Bader M, Ganten D, Andrade-Navarro MA. Emergence and evolution  
608 of the renin-angiotensin-aldosterone system. J Mol Med (Berl). 2012 May;90(5):495-508.  
609 doi: 10.1007/s00109-012-0894-z. Epub 2012 Apr 14. PMID: 22527880; PMCID:  
610 PMC3354321.
- 611 64. Vize PD, Smith HW. A Homeric view of kidney evolution: A reprint of H.W. Smith's  
612 classic essay with a new introduction. Evolution of the kidney. 1943. Anat Rec A Discov  
613 Mol Cell Evol Biol. 2004;277(2):344-354. doi:10.1002/ar.a.20017.
- 614 65. Xanthakis V, Vasan RS. Aldosterone and the risk of hypertension. Curr Hypertens Rep.  
615 2013 Apr;15(2):102-7. doi: 10.1007/s11906-013-0330-y. PMID: 23378101; PMCID:  
616 PMC3619380.
- 617 66. Funder JW. Apparent mineralocorticoid excess. J Steroid Biochem Mol Biol. 2017  
618 Jan;165(Pt A):151-153. doi: 10.1016/j.jsbmb.2016.03.010. Epub 2016 Mar 5. PMID:  
619 26956190.
- 620 67. Frey FJ, Odermatt A, Frey BM. Glucocorticoid-mediated mineralocorticoid receptor  
621 activation and hypertension. Curr Opin Nephrol Hypertens. 2004 Jul;13(4):451-8. doi:  
622 10.1097/01.mnh.0000133976.32559.b0. PMID: 15199296.
- 623 68. Chapman K, Holmes M, Seckl J.  $11\beta$ -hydroxysteroid dehydrogenases: intracellular gate-  
624 keepers of tissue glucocorticoid action. Physiol Rev. 2013;93(3):1139-1206.  
625 doi:10.1152/physrev.00020.2012.
- 626 69. Funder J. 30 YEARS OF THE MINERALOCORTICOID RECEPTOR: Mineralocorticoid  
627 receptor activation and specificity-conferring mechanisms: a brief history. J Endocrinol.  
628 2017 Jul;234(1):T17-T21. doi: 10.1530/JOE-17-0119. Epub 2017 May 22. PMID:  
629 28533421.
- 630 70. Fuller PJ, Yao YZ, Yang J, Young MJ. Structural determinants of activation of the  
631 mineralocorticoid receptor: an evolutionary perspective. J Hum Hypertens. 2021  
632 Feb;35(2):110-116. doi: 10.1038/s41371-020-0360-2. Epub 2020 May 28. PMID:  
633 32467588.
- 634 71. Hilser VJ, Thompson EB. Structural dynamics, intrinsic disorder, and allostery in nuclear  
635 receptors as transcription factors. J Biol Chem. 2011;286(46):39675-39682.  
636 doi:10.1074/jbc.R111.278929.
- 637 72. Changeux JP, Christopoulos A. Allosteric Modulation as a Unifying Mechanism for  
638 Receptor Function and Regulation. Cell. 2016 Aug 25;166(5):1084-1102. doi:  
639 10.1016/j.cell.2016.08.015. PMID: 27565340.
- 640 73. Oka K, Hoang A, Okada D, Iguchi T, Baker ME, Katsu Y. Allosteric role of the amino-  
641 terminal A/B domain on corticosteroid transactivation of gar and human glucocorticoid

642 receptors. *J Steroid Biochem Mol Biol.* 2015;154:112-119.  
643 doi:10.1016/j.jsbmb.2015.07.025.

644
